# Supplementary material for: Dimensionality control of magnetic coupling at interfaces of cuprate–manganite superlattices
Source: Royal Society of Chemistry journal article supplement (doi:10.1039/d1mh00790d), 2021-01-01
Supplement: d1mh00790d1.pdf [file d1mh00790d1.pdf]

**Supporting Information for**  
**Dimensionality Control of Magnetic Coupling at Interfaces of**  
**Cuprate-Manganite Superlattices**

Guowei Zhou,<sup>‡\*ab</sup> Huihui Ji,<sup>‡a</sup> Zhi Yan,<sup>a</sup> Penghua Kang,<sup>a</sup> Zhilan Li,<sup>a</sup> and Xiaohong Xu<sup>\*ab</sup>

<sup>a</sup> *School of Chemistry and Materials Science of Shanxi Normal University & Key Laboratory of Magnetic Molecules and Magnetic Information Materials of Ministry of Education, Linfen 041004, China.*

<sup>b</sup> *Research Institute of Materials Science of Shanxi Normal University & Collaborative Innovation Center for Shanxi Advanced Permanent Magnetic Materials and Technology, Linfen 041004, China.*

<sup>‡</sup> These authors contributed equally.

\* Corresponding Authors: [zhougw@sxnu.edu.cn](mailto:zhougw@sxnu.edu.cn); [xuxh@sxnu.edu.cn](mailto:xuxh@sxnu.edu.cn)

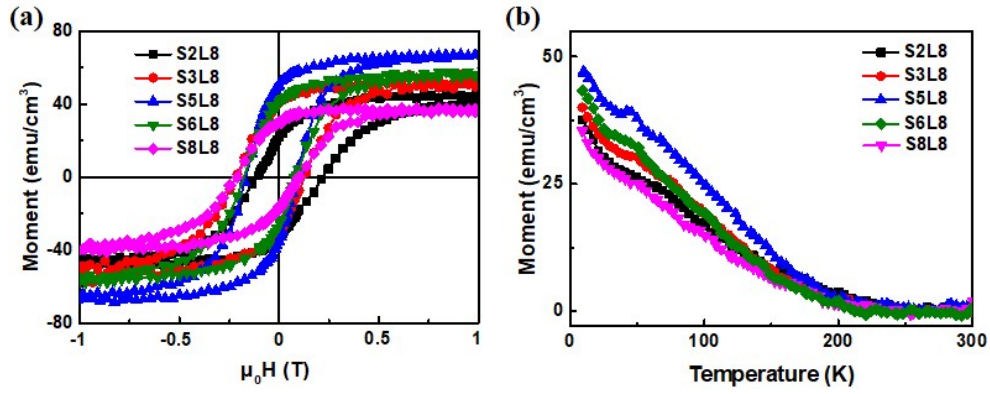

Fig. S1 (a) The magnetic hysteresis loops for a series of S(n)L(8) ( $1 \leq n \leq 8$ ) superlattices measured at 5 K after +0.5 T in-plane field cooling process from room temperature. (b) The temperature dependence of magnetic moment for different S(n)L(8) superlattices from 5-300 K under 0.1 T test field.

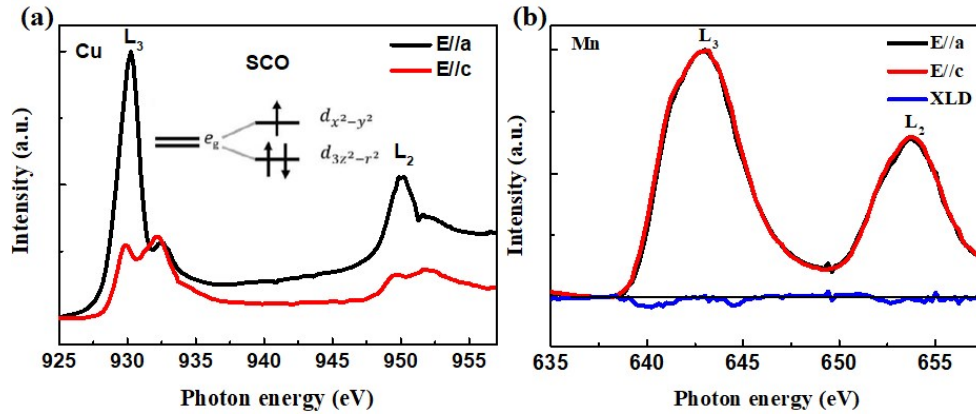

Fig. S2 (a) The XAS and XLD spectra at Cu  $L$ -edge and (b) the XAS spectra at Mn  $L$ -edge measured at room temperature with orthogonal linearly polarized light for the comparison LSMO and SCO single films. The negative XLD data indicate the preferential  $x^2-y^2$  orbital is consistent with the traditional LSMO film growth on STO substrate. The larger in-plane XAS curve suggested most holes occupy the  $x^2-y^2$  orbital in the SCO films.

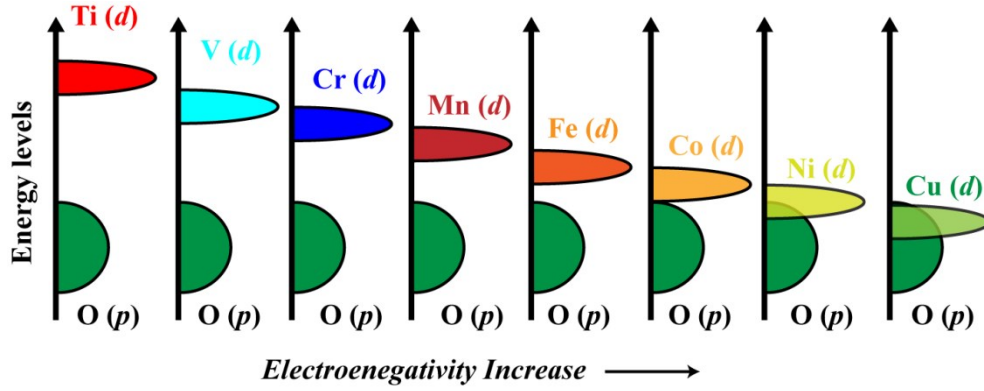

Fig. S3 Schematics of energy levels of transition metal  $d$  states with respect to oxygen  $p$  states in  $3d$  transition metal oxide  $AMO_3$  ( $M = \text{Ti, V, Cr, Mn, Fe, Co, Ni}$  and  $\text{Cu}$ ). As the number of transition metal elements increase, the metal  $d$  level decrease. For titanates, the  $\text{Ti-}d$  states lie above the  $\text{O-}p$  by about 3 eV. For nickelates and cuprates, the  $\text{Ni-}d$  and  $\text{Cu-}d$  states even lie below the  $\text{O-}p$  states, leading to a “negative charge transfer” energy and strong hybridization.

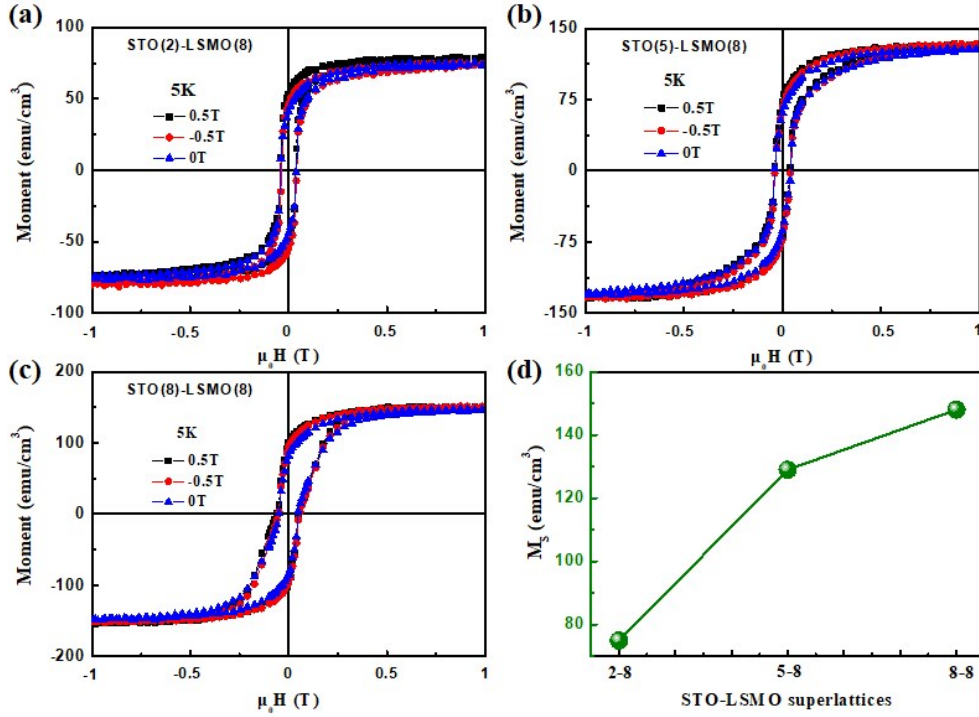

Fig. S4 (a-c) Magnetic hysteresis loops for STO(2)/LSMO(8), STO(5)/LSMO(8), and STO(8)/LSMO(8) superlattices measured at 5 K after zero-field-cooling and  $\pm 0.5$  T in-plane field-cooling process from room temperature. (d) The saturation magnetization dependence on the STO layers thickness. The monotonical increase of the saturation magnetization with increasing superlattices thickness indicate the non-magnetic STO material cannot instead of the infinite SCO layer.
